# Supplementary material for: Single-cell transcriptomics identifies Mcl-1 as a target for senolytic therapy in cancer
Source: PubMed Central journal article supplement (PMC9023465; doi:10.1038/s41467-022-29824-1), 2022-04-21
Supplement: 41467_2022_29824_MOESM2_ESM.pdf [file 41467_2022_29824_MOESM2_ESM.pdf]

## **Description of Additional Supplementary Files**

File Name: Supplementary Data 1

Description: Pathway analysis and differential expression analysis results of senescent cells compared to not senescent cells.

File Name: Supplementary Data 2

Description: Differential expression analysis results of different senescent clusters.

File Name: Supplementary Data 3

Description: Pathway analysis of senescent cells classified based on Bcl2 and Mcl1 expression.

File Name: Supplementary Data 4

Description: Statistic results for main and supplementary figures.

File Name: Supplementary Data 5

Description: R code for Senescence Index tool (SIT).
